# Supplementary material for: Functionalization of Graphene by π–π Stacking with C60/C70/Sc3N@C80 Fullerene Derivatives for Supercapacitor Electrode Materials
Source: MDPI journal article supplement (doi:10.3390/c8010017), 2022-03-11
Supplement: s1 [file s1]

## Supplementary Materials

# Functionalization of graphene by $\pi$ – $\pi$ stacking with $C_{60}/C_{70}/Sc_3N@C_{80}$ fullerene derivatives for supercapacitor electrode materials

Piotr Piotrowski <sup>1,\*</sup>, Agata Fedorczyk <sup>1</sup>, Jacek Grebowski and Agnieszka Krogul-Sobczak<sup>1</sup>

<sup>1</sup> Faculty of Chemistry, University of Warsaw, Pasteura 1, 02-093 Warsaw, Poland

<sup>2</sup> Department of Molecular Biophysics, Faculty of Biology and Environmental Protection, University of Lodz, Pomorska 141/143, 90-236 Lodz, Poland

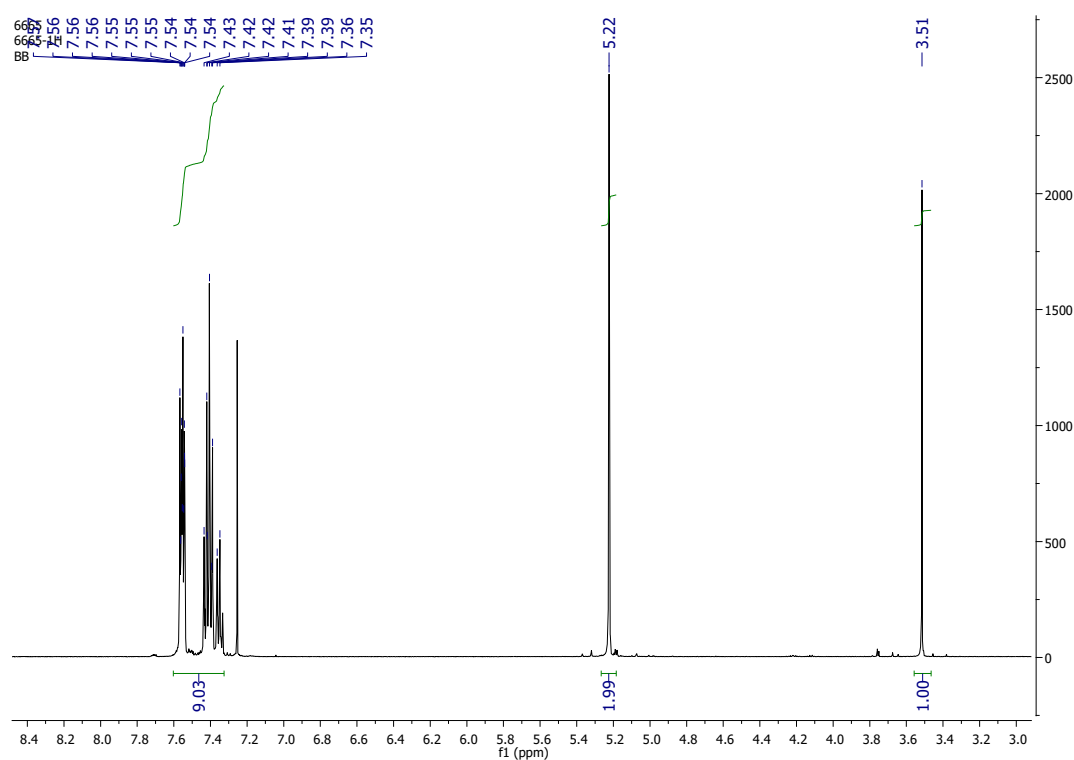

**Figure S1.** <sup>1</sup>H NMR spectrum of bis([1,1'-biphenyl]-4-ylmethyl) malonate (BB).

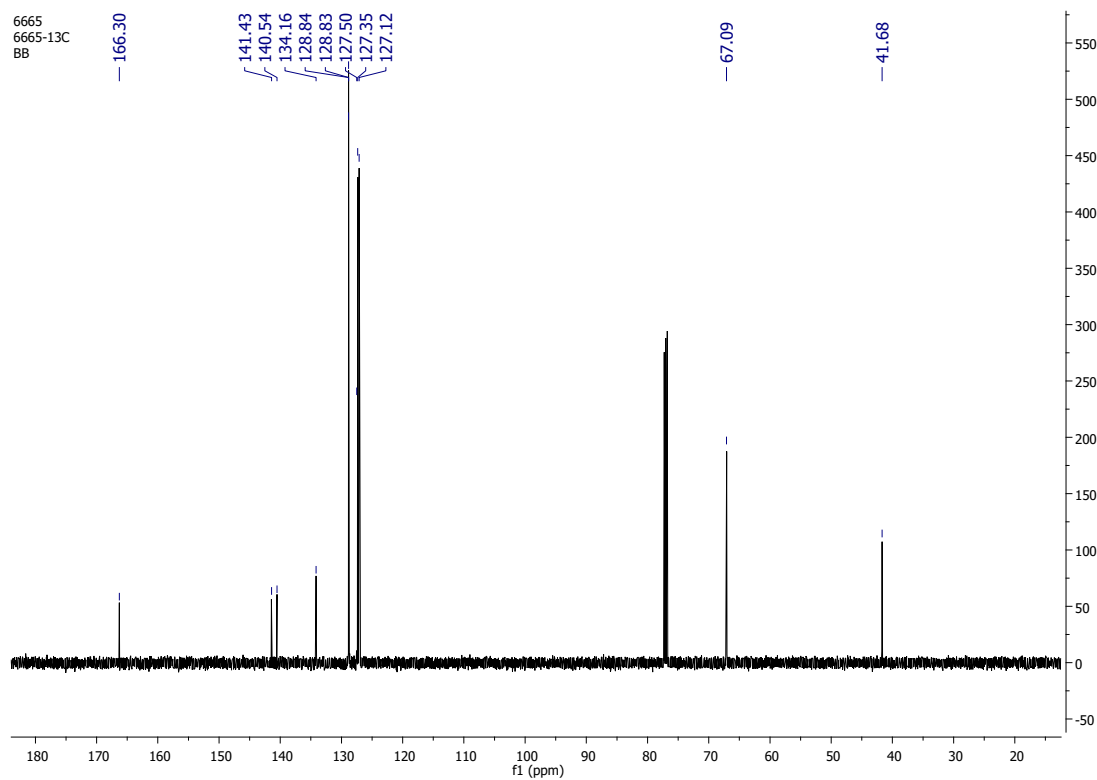

**Figure S2.**  $^{13}\text{C}$  NMR spectrum of bis([1,1'-biphenyl]-4-ylmethyl) malonate (BB).

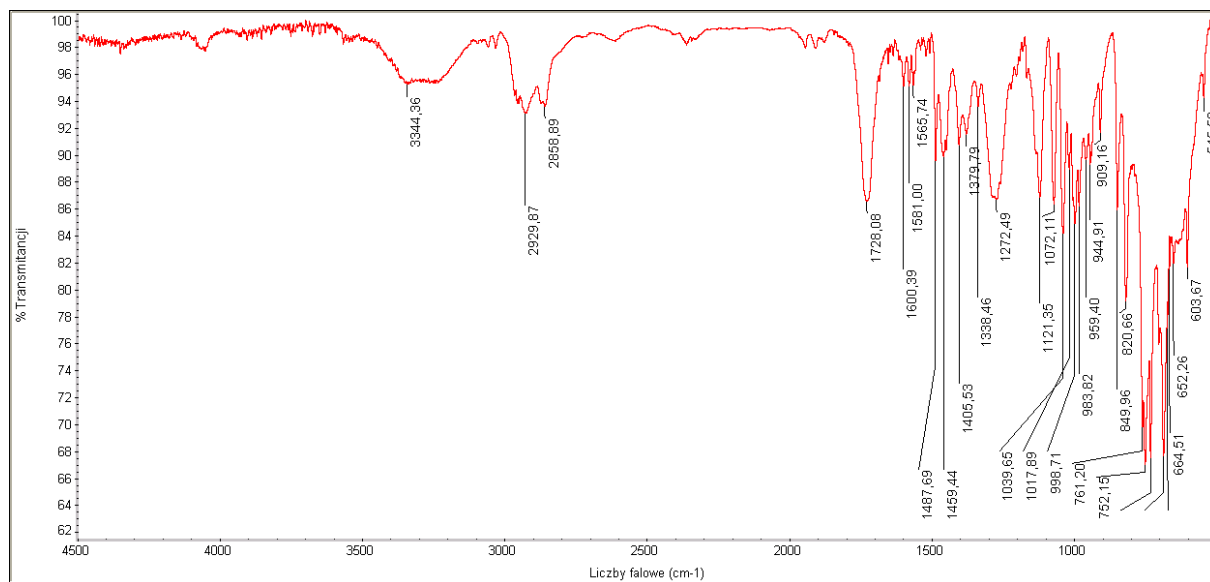

**Figure S3.** FT-IR spectrum of bis([1,1'-biphenyl]-4-ylmethyl) malonate (BB).

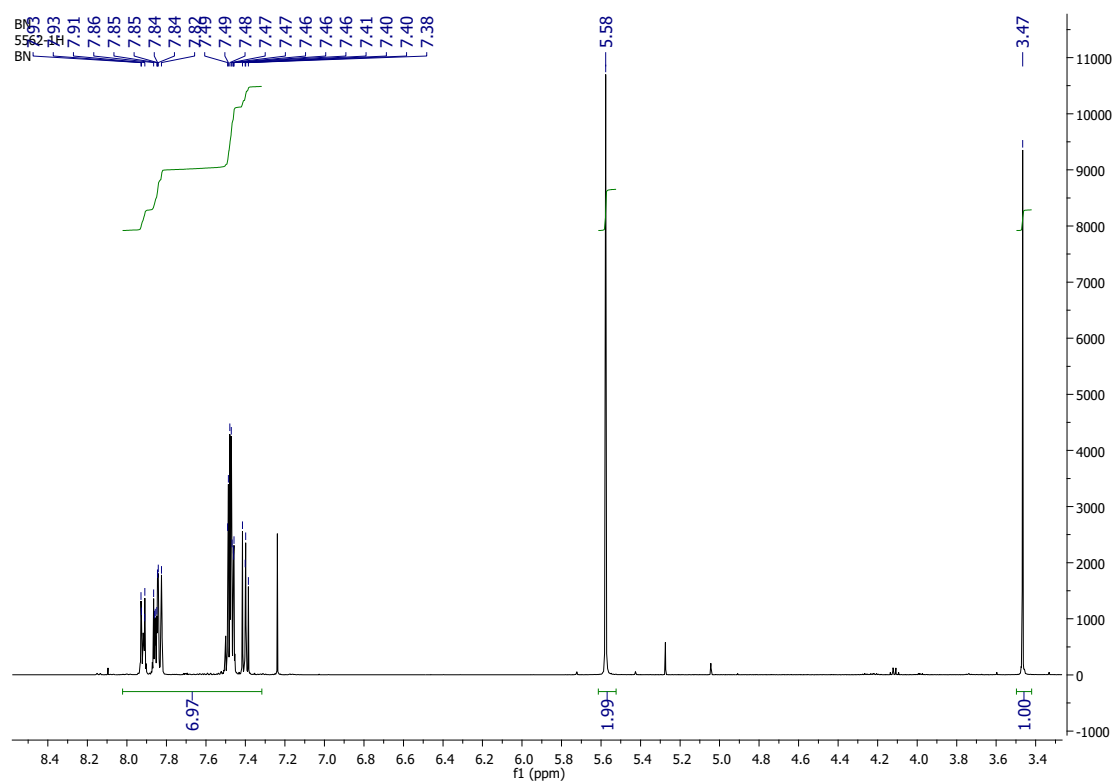

**Figure S4.** <sup>1</sup>H NMR spectrum of bis(naphthalen-1-ylmethyl) malonate (BN).

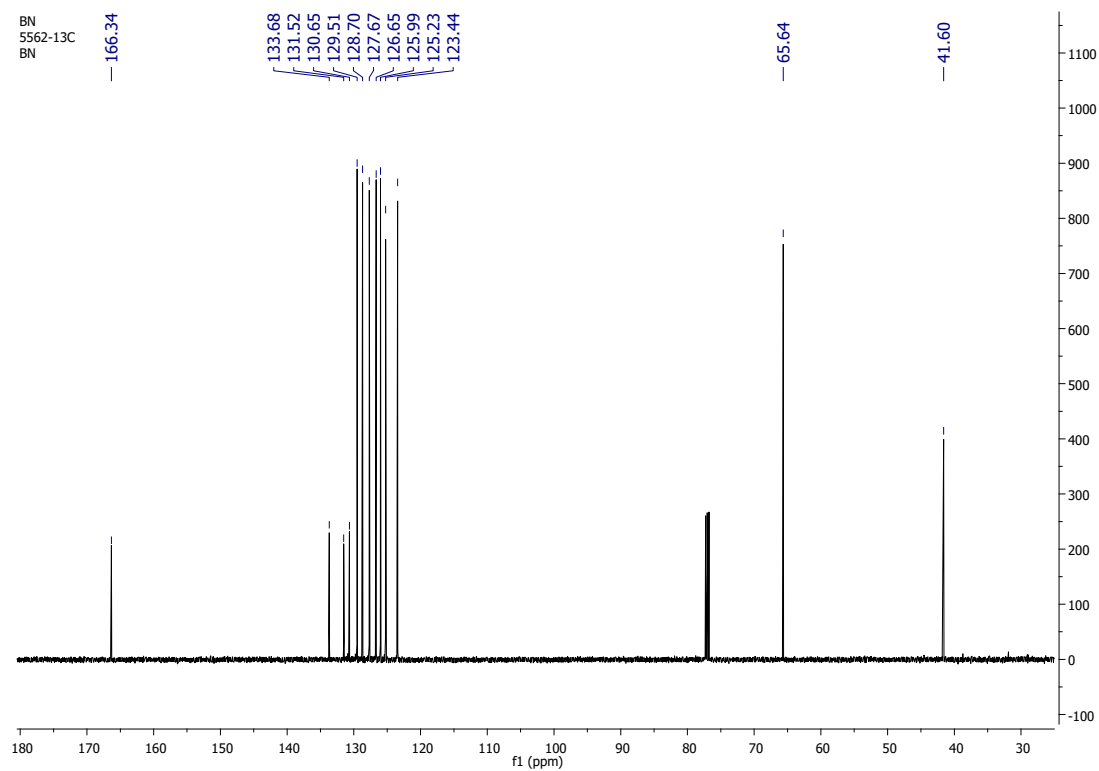

**Figure S5.** <sup>13</sup>C NMR spectrum of bis(naphthalen-1-ylmethyl) malonate (BN).

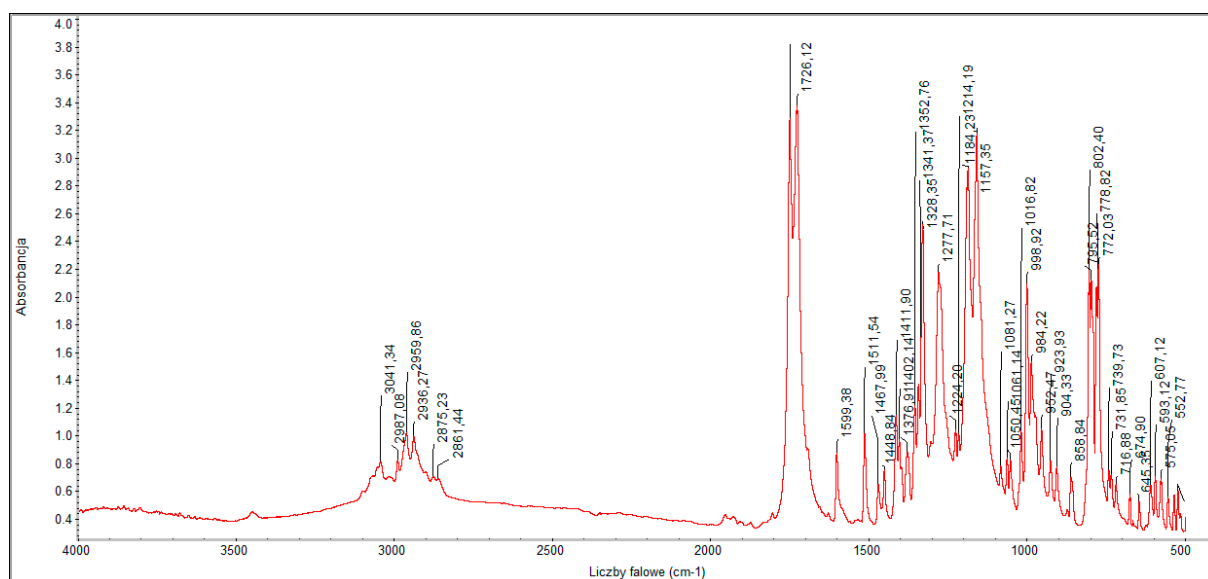

**Figure S6.** FT-IR spectrum of bis(naphthalen-1-ylmethyl) malonate (BN).

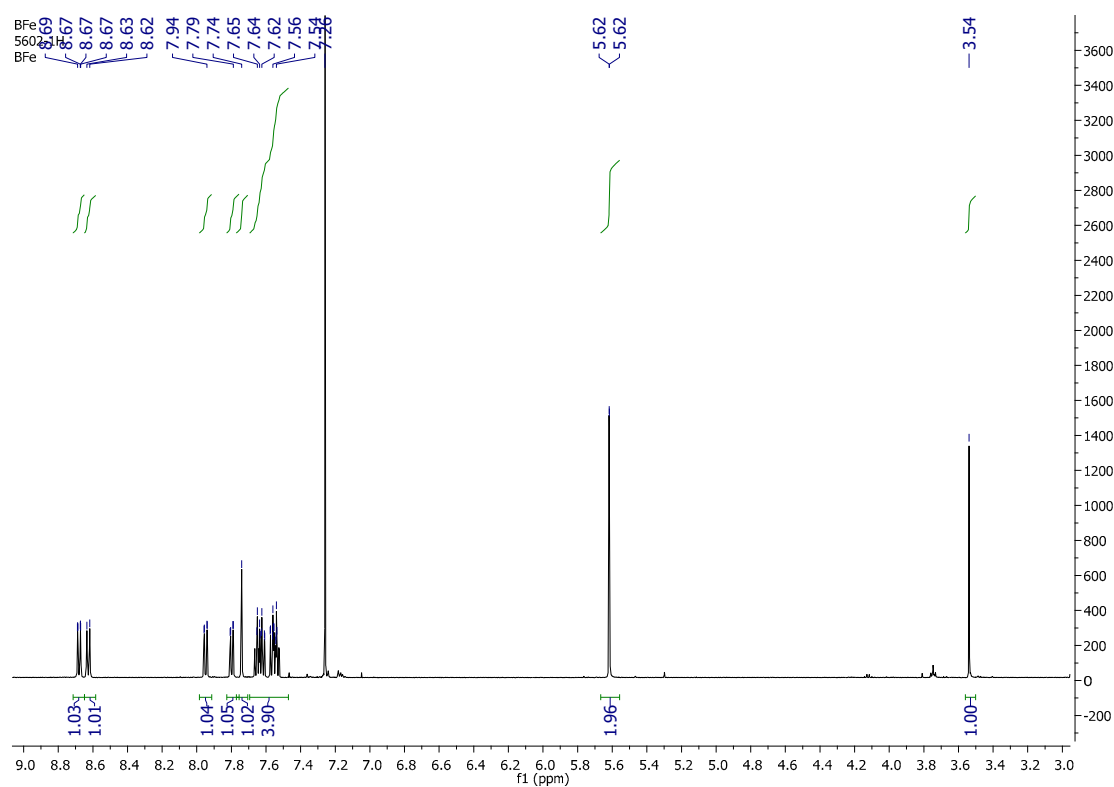

**Figure S7.** <sup>1</sup>H NMR spectrum of bis(phenanthren-9-ylmethyl) malonate (BF).

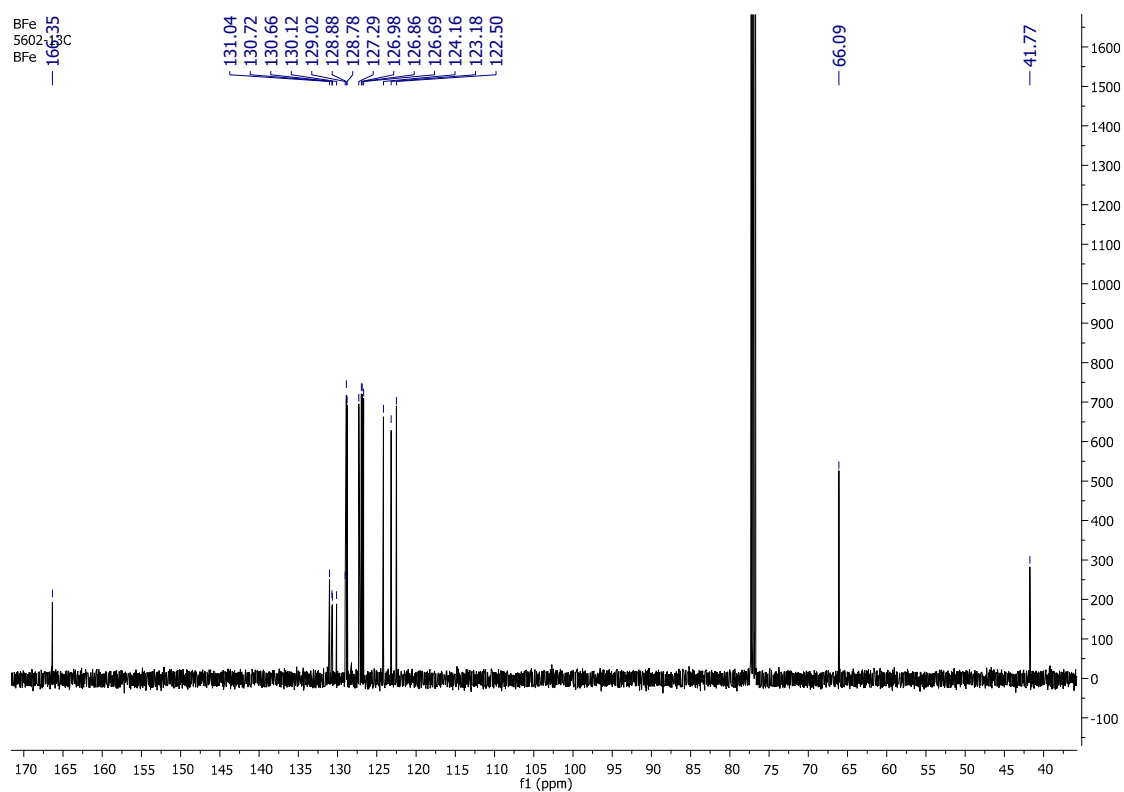

**Figure S8.**  $^{13}\text{C}$  NMR spectrum of bis(phenanthren-9-ylmethyl) malonate (BF).

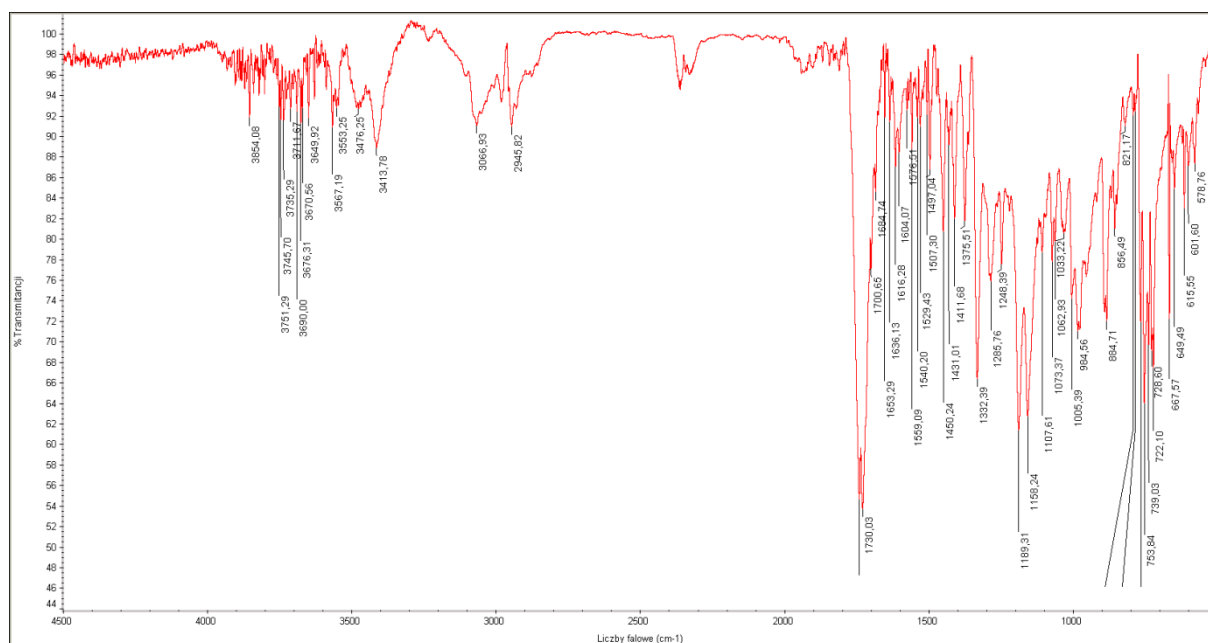

**Figure S9.** FT-IR spectrum of bis(phenanthren-9-ylmethyl) malonate (BF).

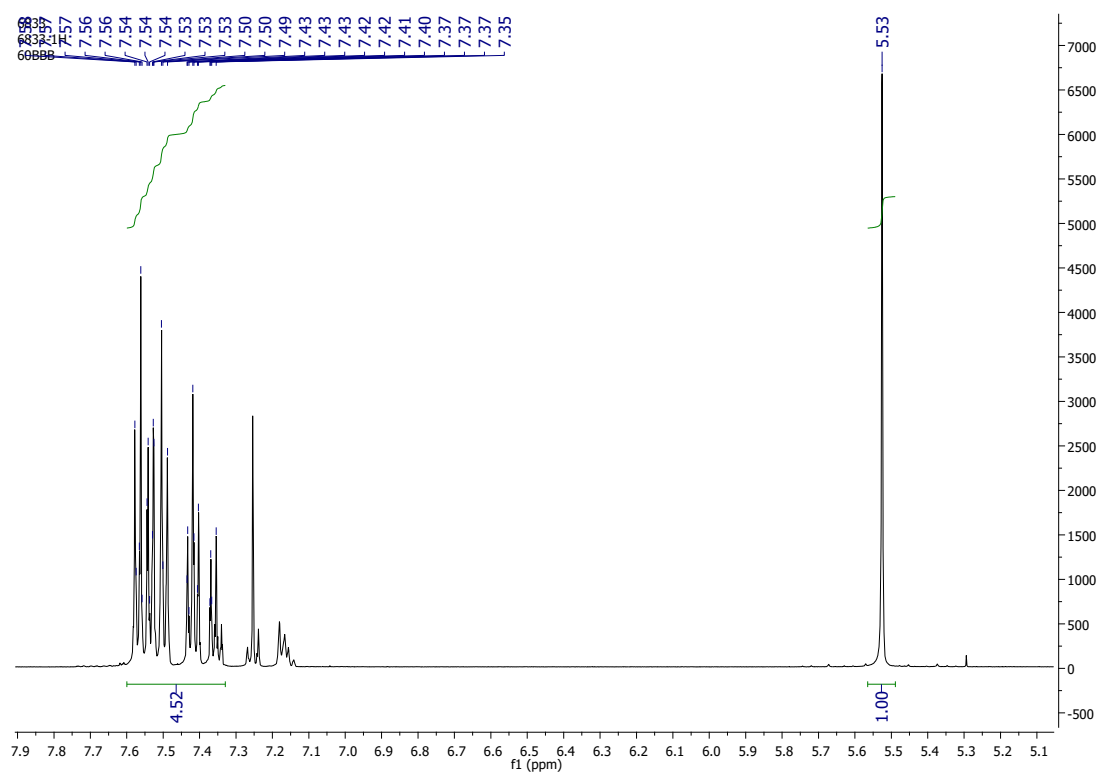

**Figure S10.** <sup>1</sup>H NMR spectrum of biphenyl functionalized C<sub>60</sub> fullerene (BB6).

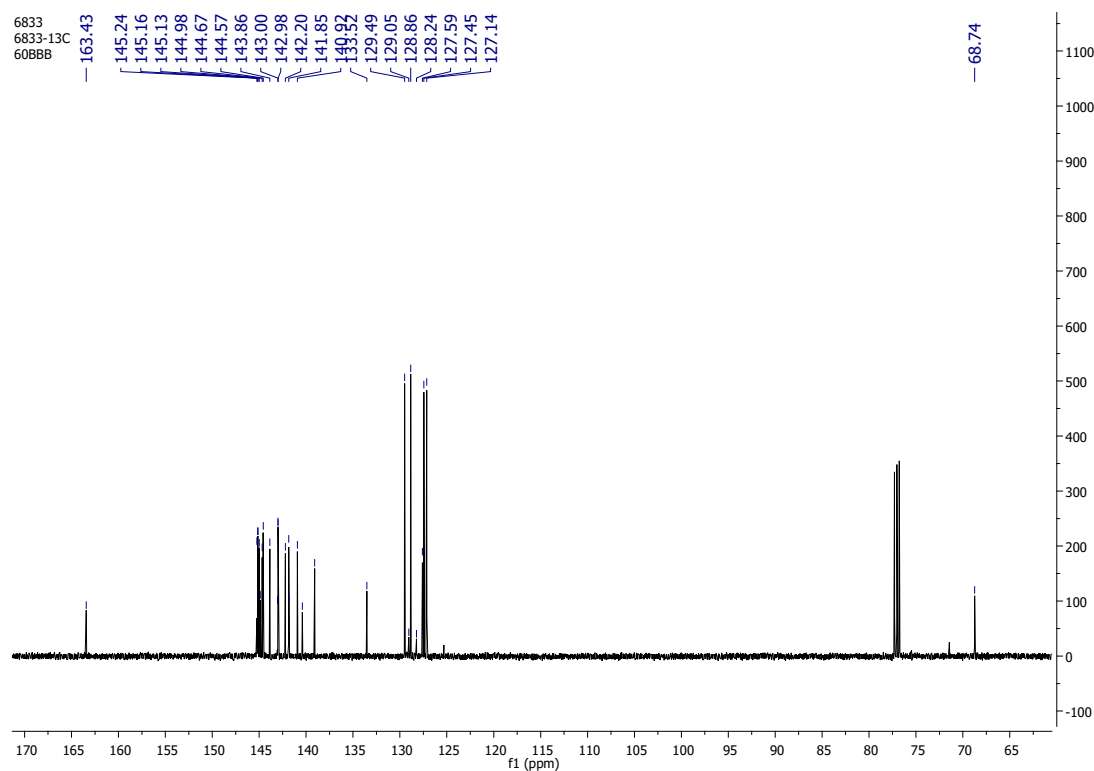

**Figure S11.** <sup>13</sup>C NMR spectrum of biphenyl functionalized C<sub>60</sub> fullerene (BB6).

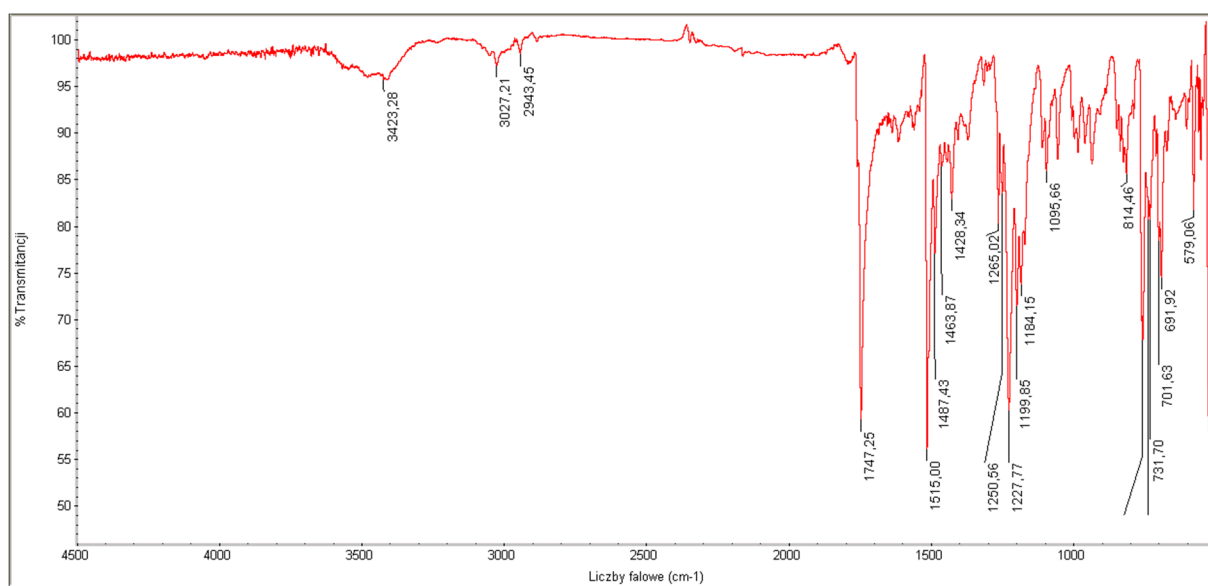

**Figure S12.** FT-IR spectrum of biphenyl functionalized C<sub>60</sub> fullerene (BB6).

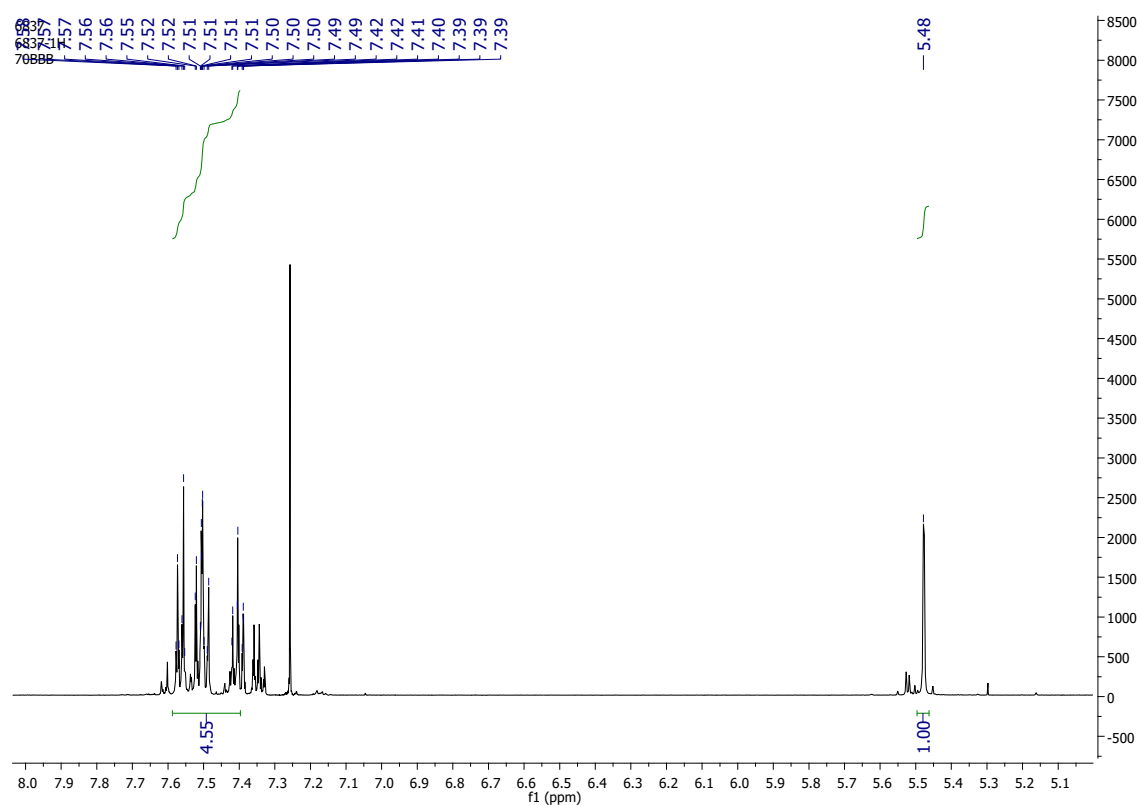

**Figure S13.** <sup>1</sup>H NMR spectrum of biphenyl functionalized C<sub>60</sub> fullerene (BB7).

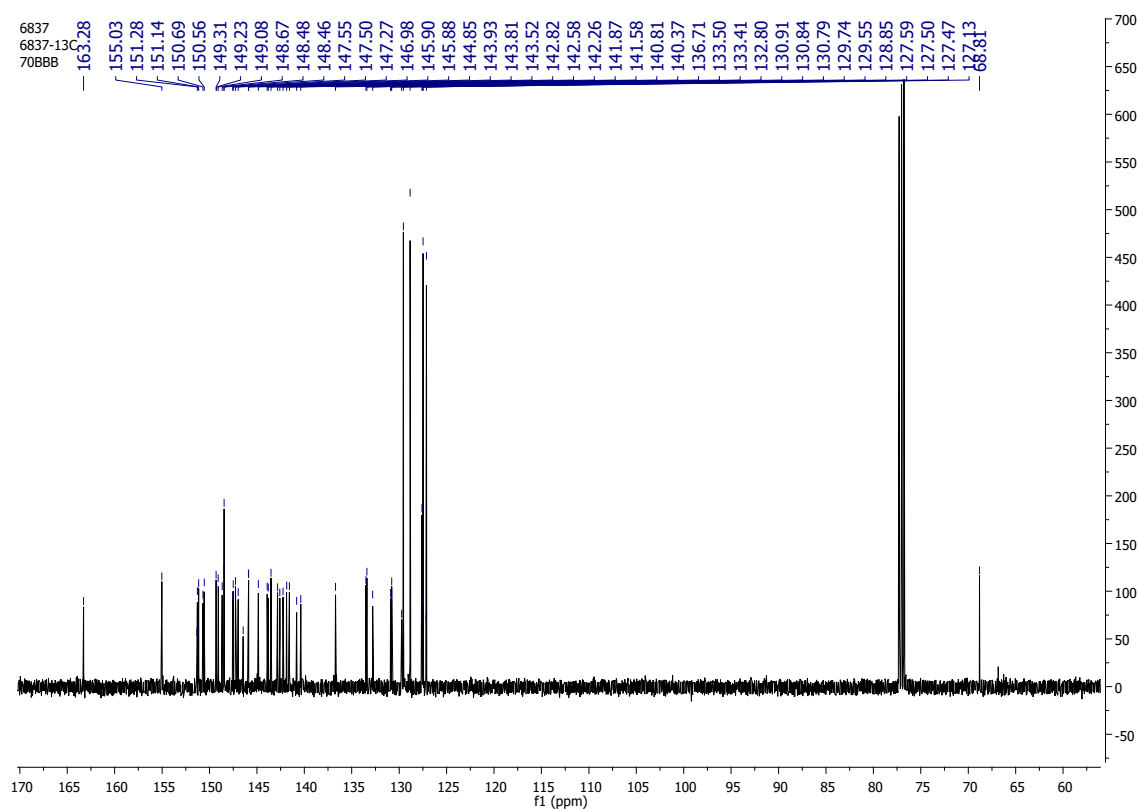

**Figure S14.** <sup>13</sup>C NMR spectrum of biphenyl functionalized C<sub>60</sub> fullerene (BB7).

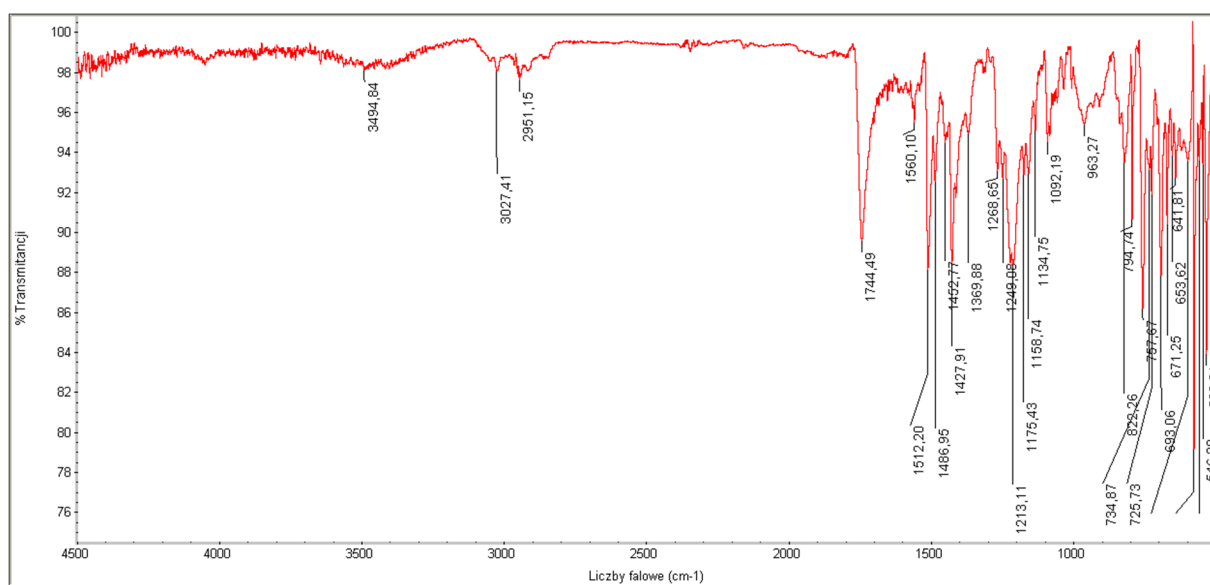

**Figure S15.** FT-IR spectrum of biphenyl functionalized C<sub>60</sub> fullerene (BB7).



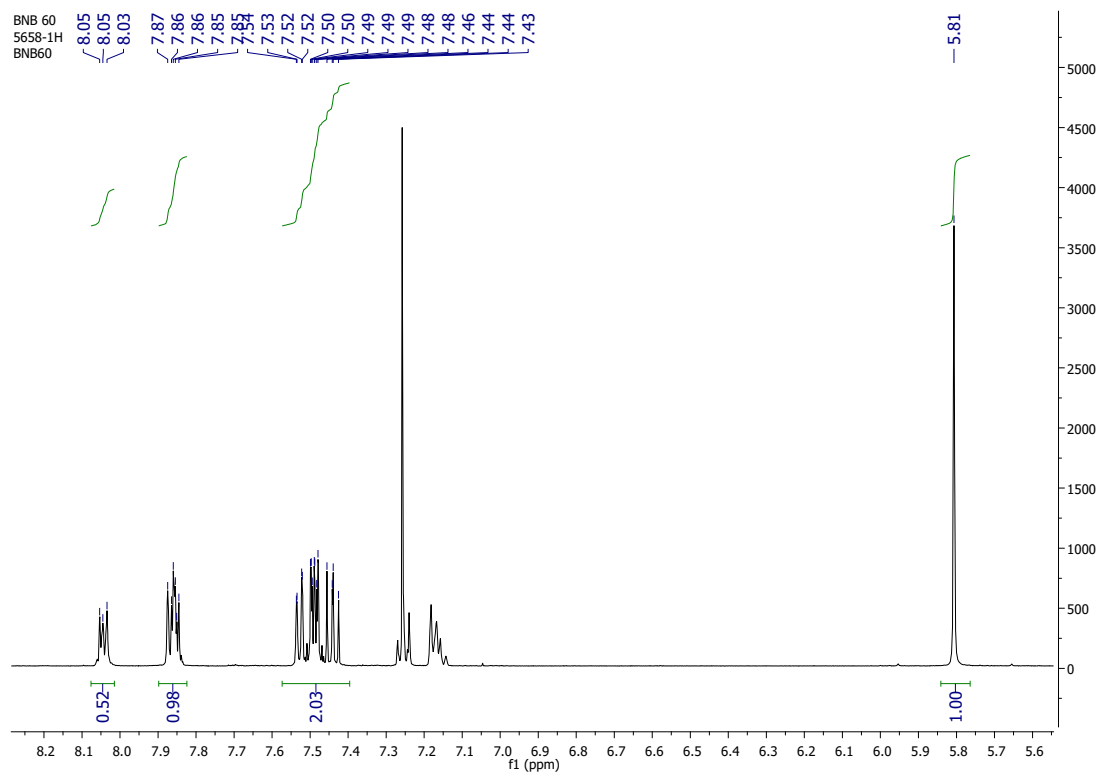

**Figure S16.**  $^1\text{H}$  NMR spectrum of naphthalene functionalized  $\text{C}_{60}$  fullerene (BN6).

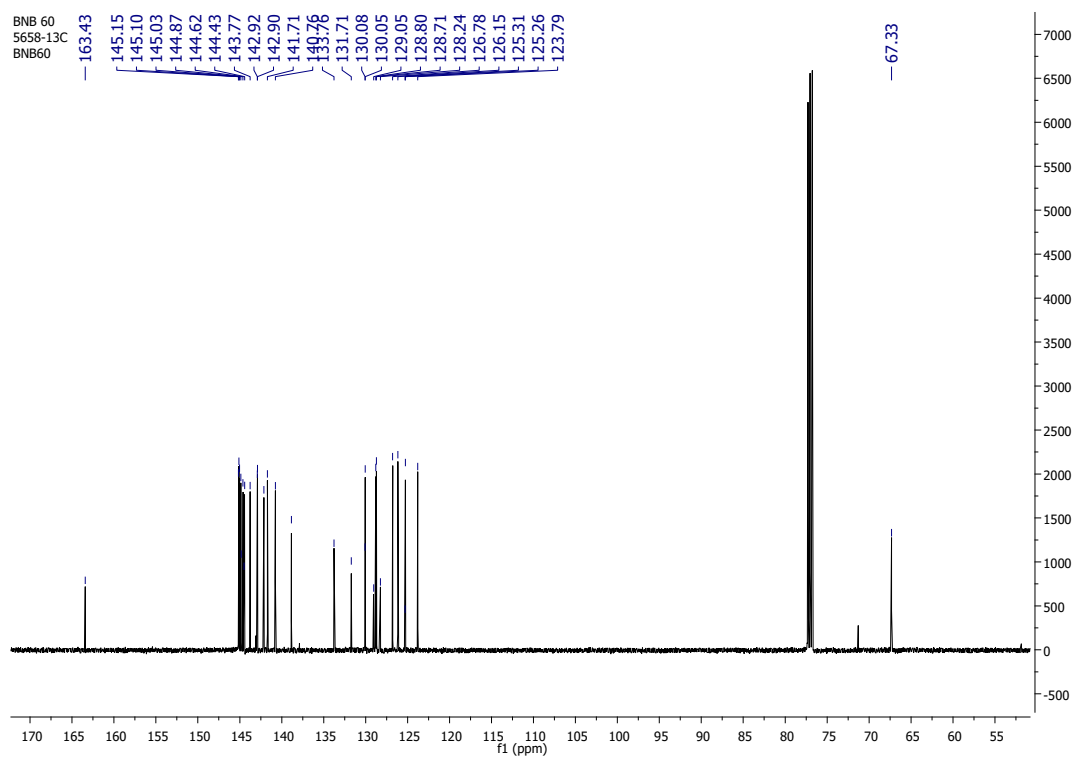

**Figure S17.**  $^{13}\text{C}$  NMR spectrum of naphthalene functionalized  $\text{C}_{60}$  fullerene (BN6).

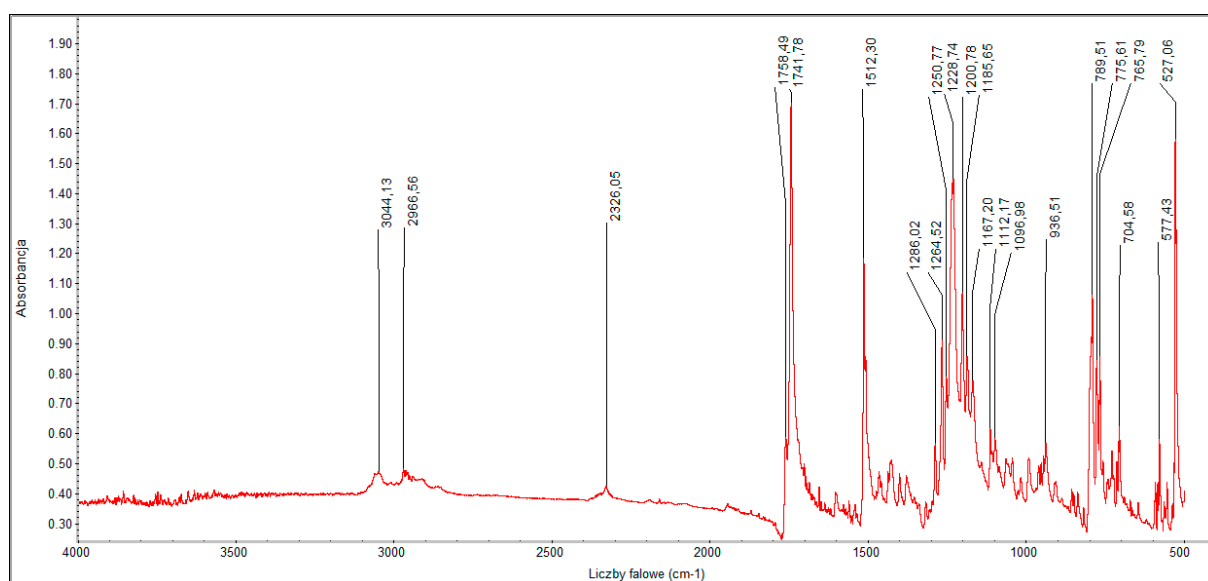

**Figure S18.** FT-IR spectrum of naphthalene functionalized C<sub>60</sub> fullerene (BN6).

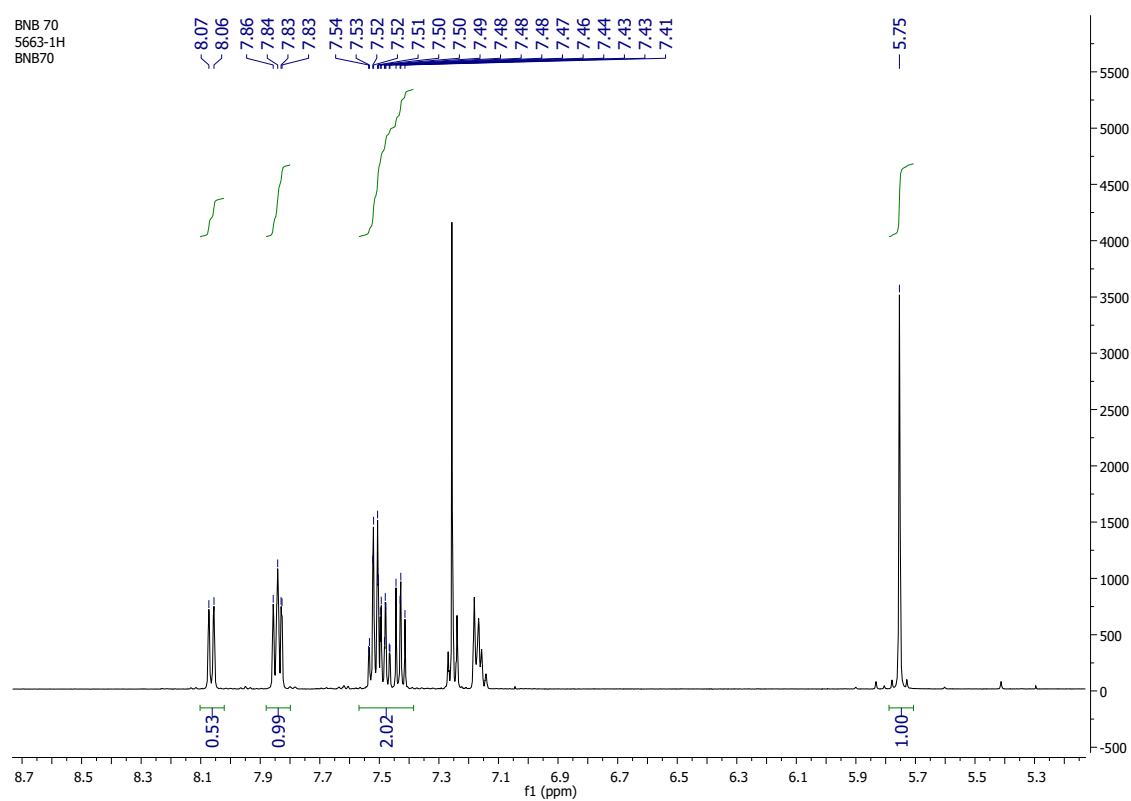

**Figure S19.** <sup>1</sup>H NMR spectrum of naphthalene functionalized C<sub>60</sub> fullerene (BN7).

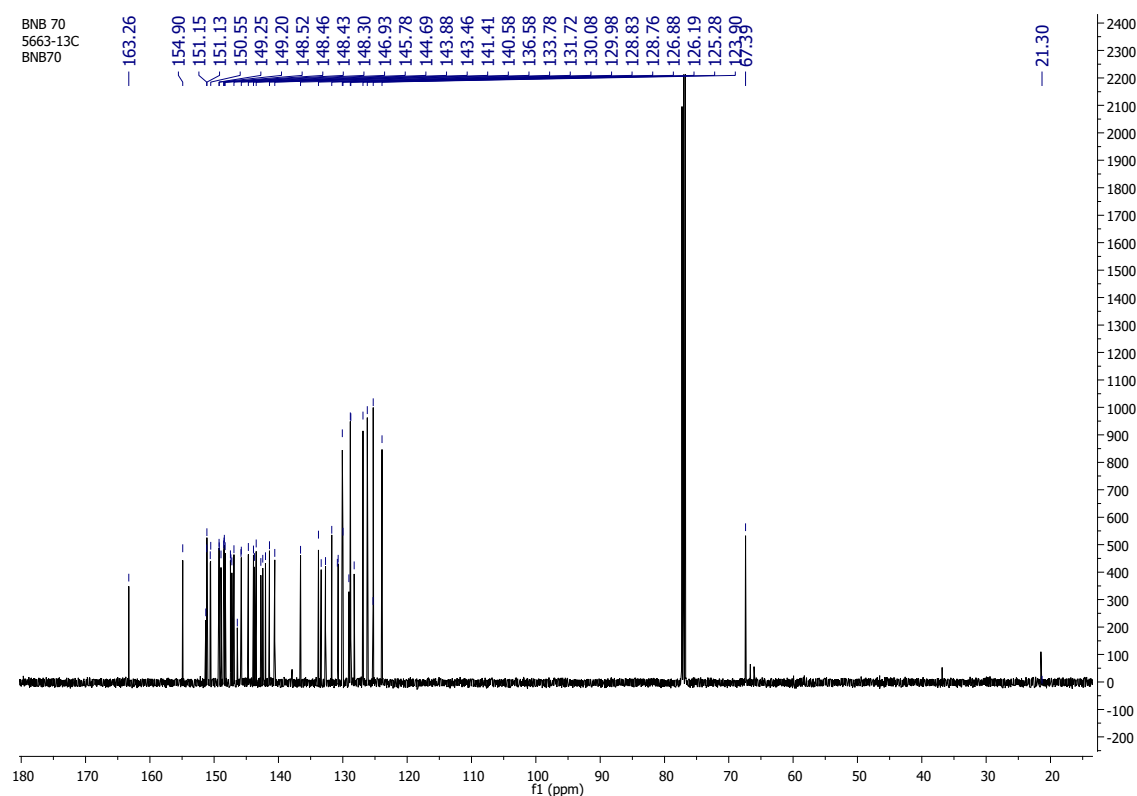

**Figure S20.**  $^{13}\text{C}$  NMR spectrum of naphthalene functionalized  $\text{C}_{60}$  fullerene (BN7).

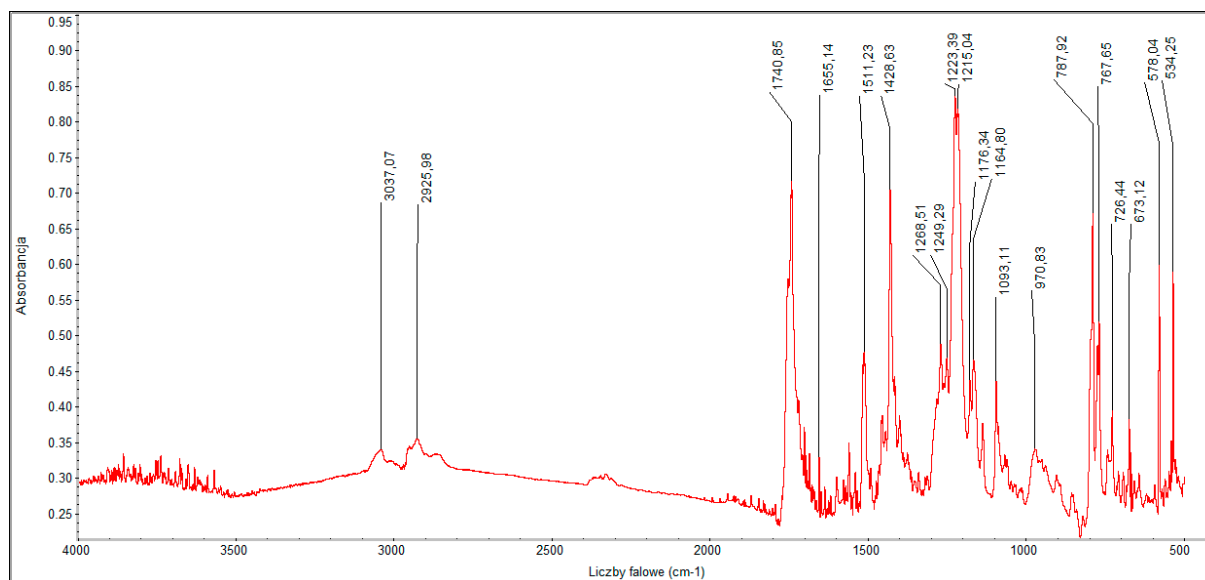

**Figure S21.** FT-IR spectrum of naphthalene functionalized  $\text{C}_{60}$  fullerene (BN7).

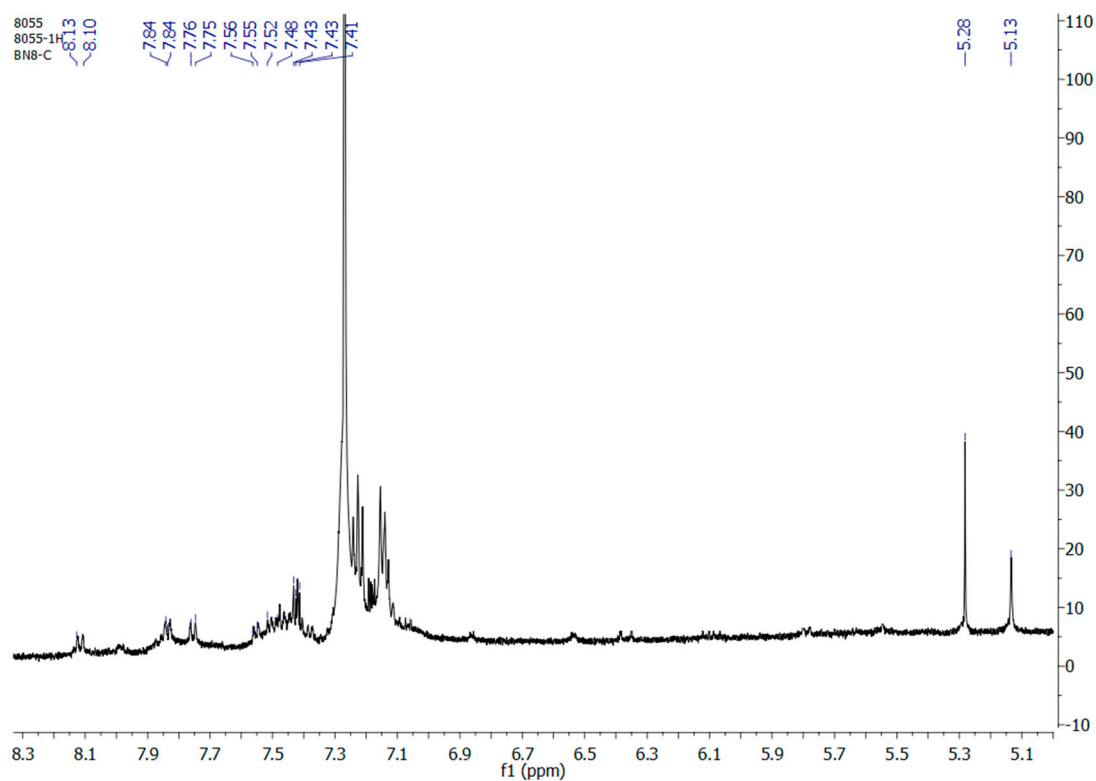

**Figure S22.**  $^1\text{H}$  NMR spectrum of naphthalene functionalized  $\text{C}_{60}$  fullerene (BN8).

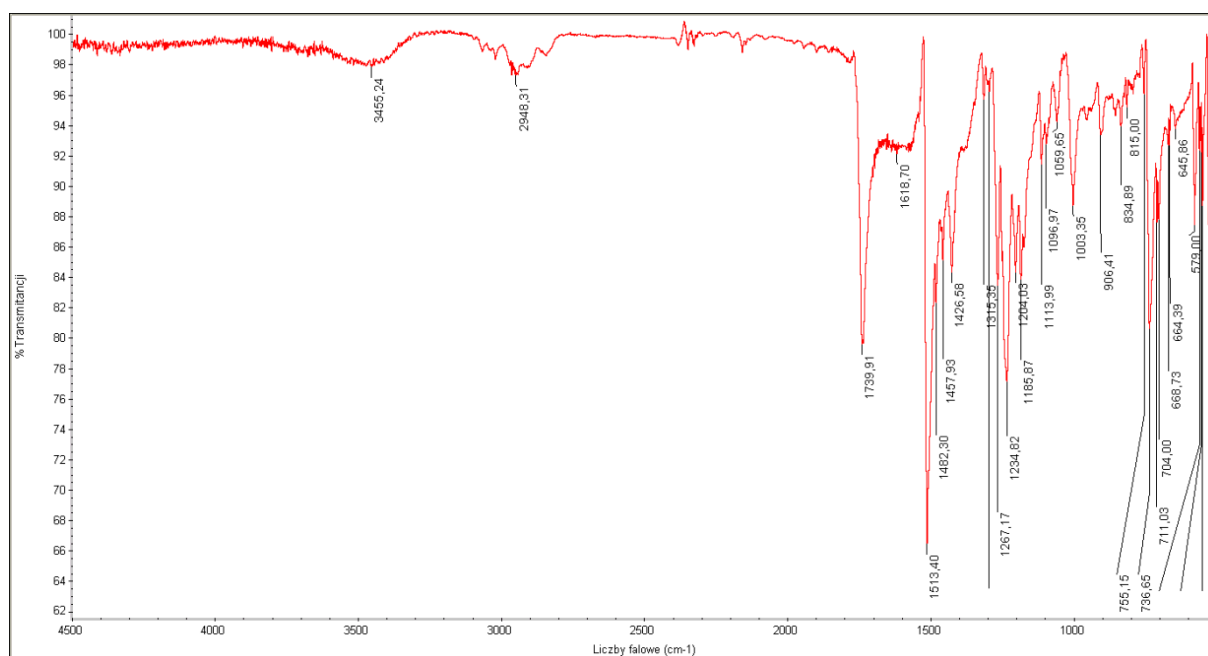

**Figure S23.** FT-IR spectrum of naphthalene functionalized  $\text{C}_{60}$  fullerene (BN8).

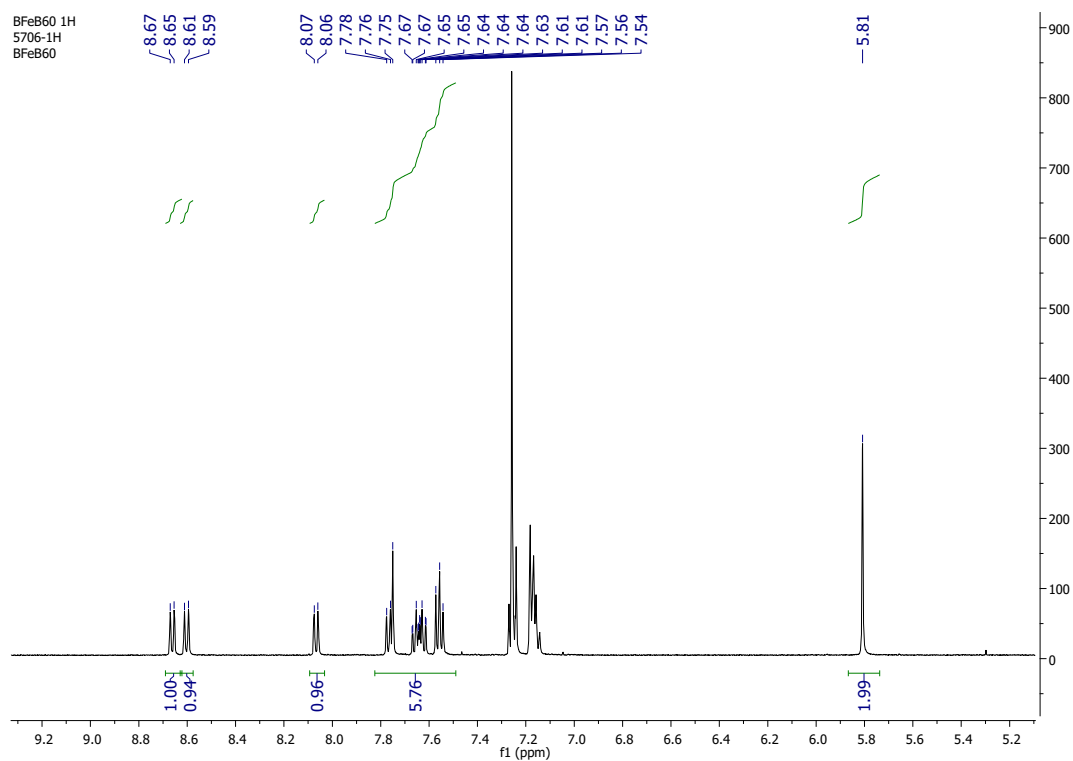

**Figure S24.** <sup>1</sup>H NMR spectrum of phenanthrene functionalized C<sub>60</sub> fullerene (BF6).

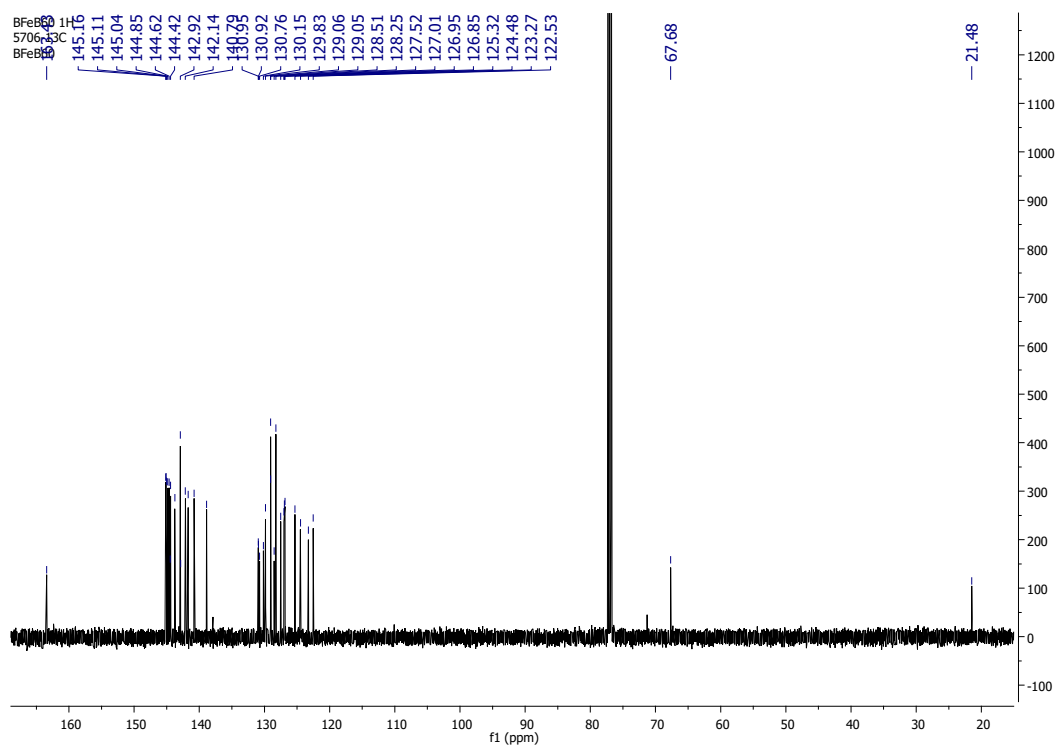

**Figure S25.** <sup>13</sup>C NMR spectrum of phenanthrene functionalized C<sub>60</sub> fullerene (BF6).

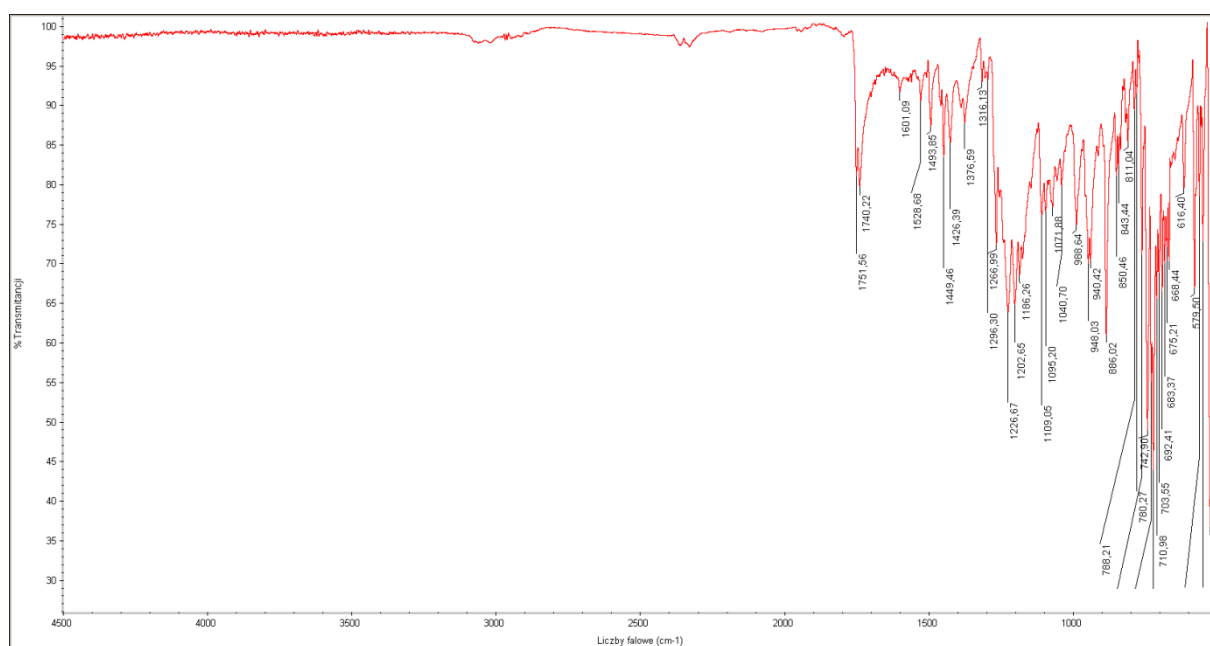

**Figure S26.** FT-IR spectrum of phenanthrene functionalized C<sub>60</sub> fullerene (BF6).

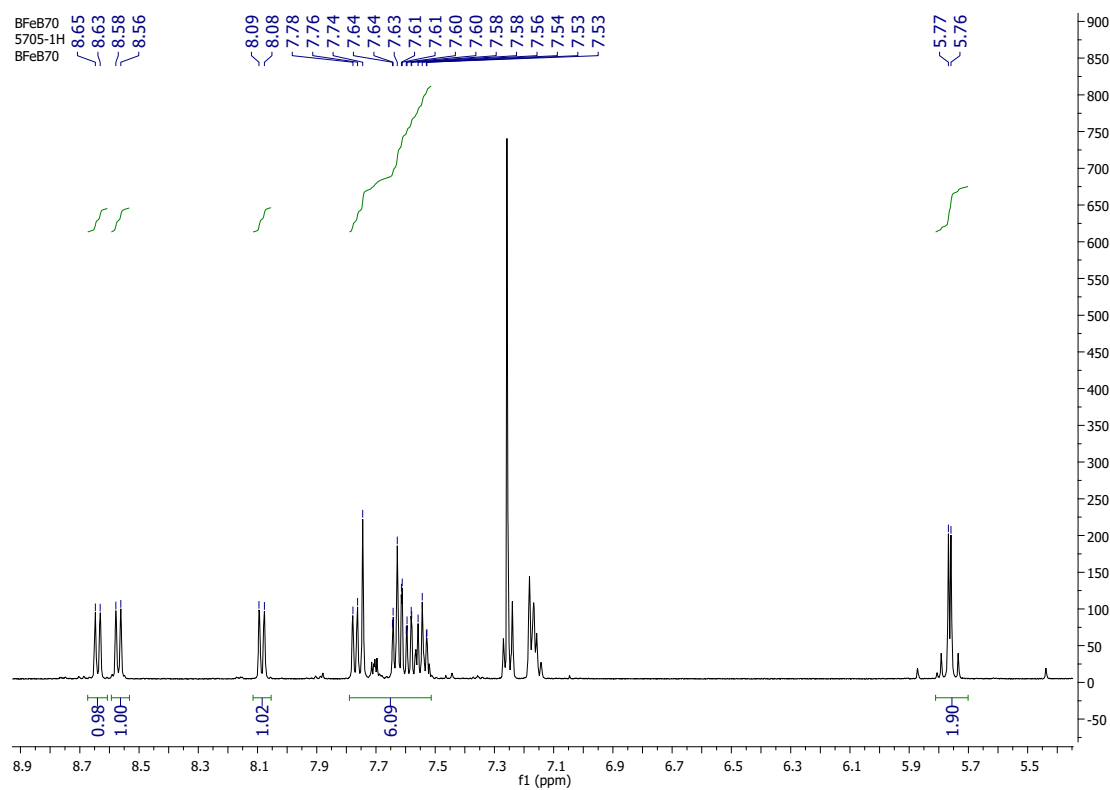

**Figure S27.** <sup>1</sup>H NMR spectrum of phenanthrene functionalized C<sub>60</sub> fullerene (BF7).

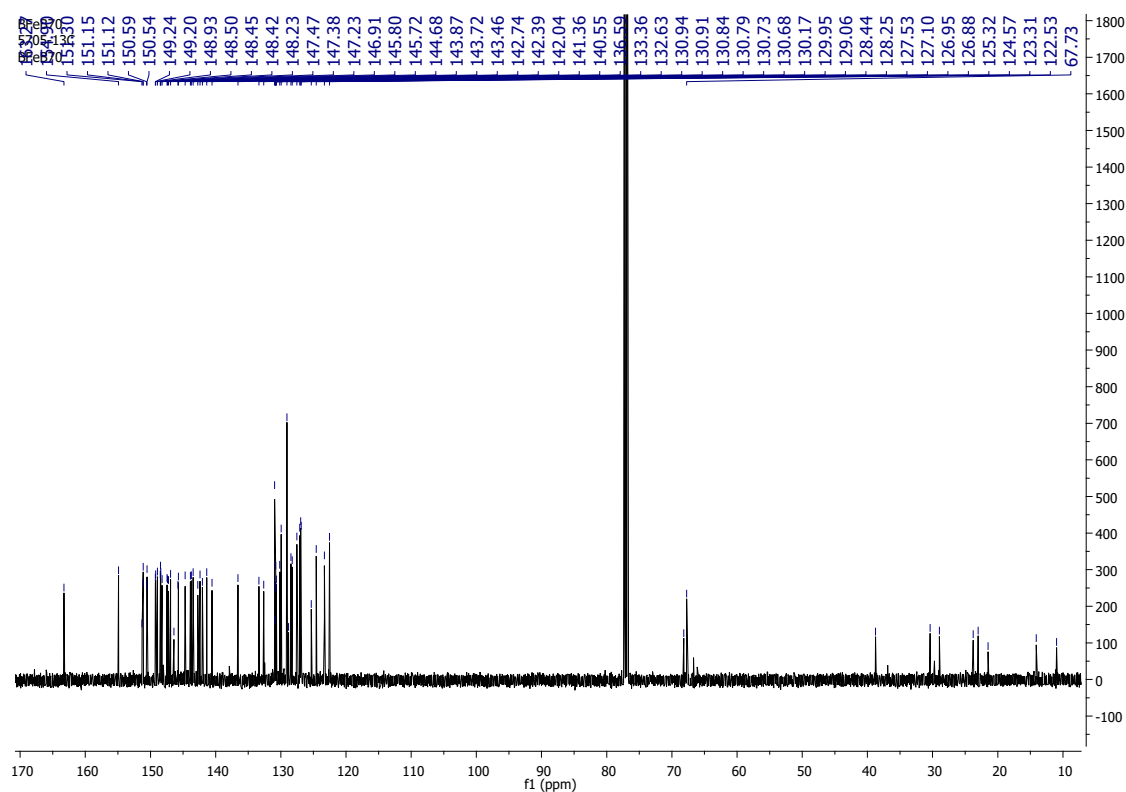

**Figure S28.** <sup>13</sup>C NMR spectrum of phenanthrene functionalized C<sub>60</sub> fullerene (BF7).

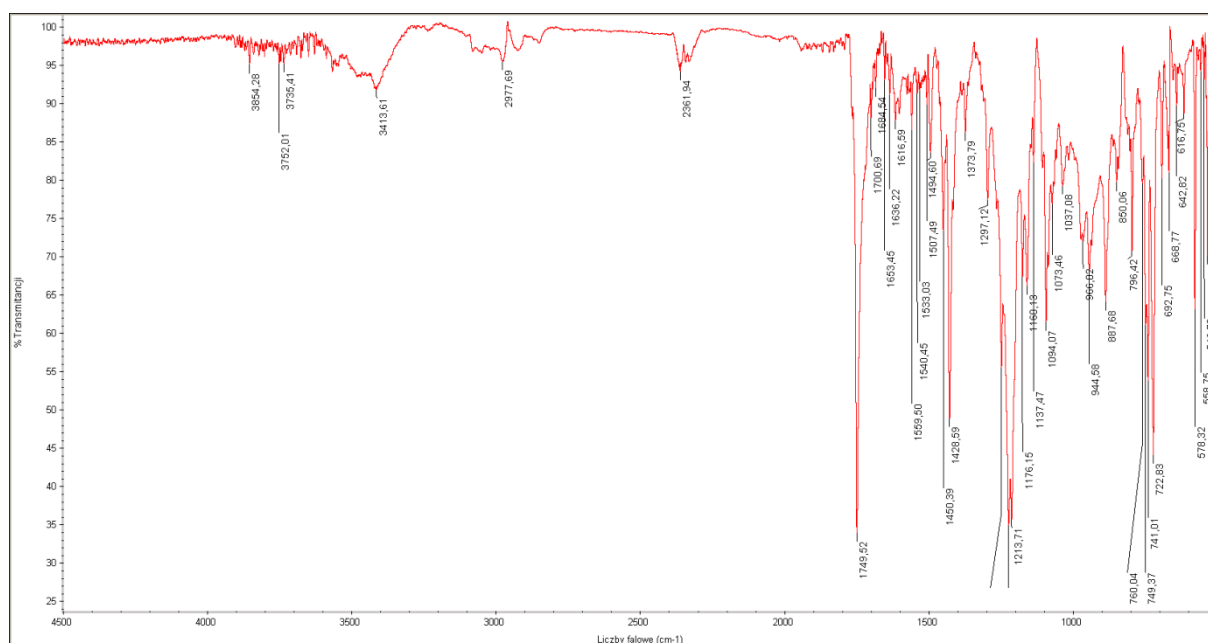

**Figure S29.** FT-IR spectrum of phenanthrene functionalized C<sub>60</sub> fullerene (BF7).

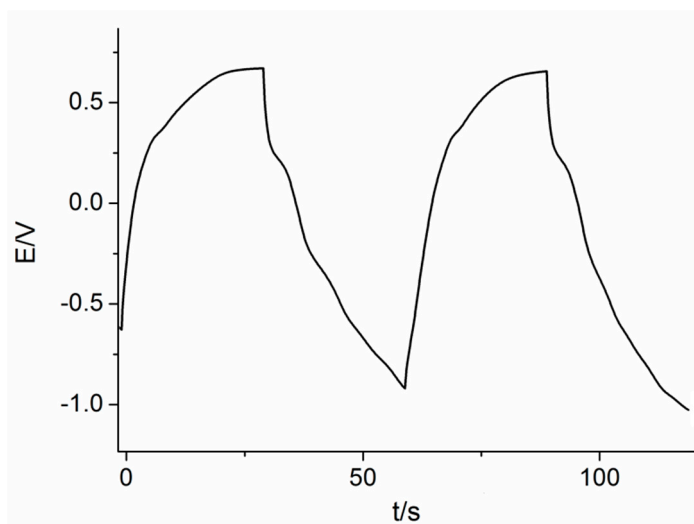

**Figure S30.** GCD curves registered for graphene functionalized with **BB6**.

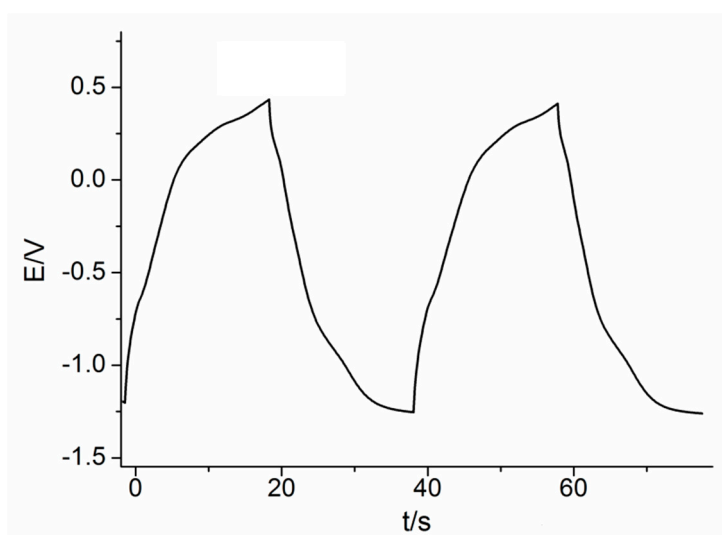

**Figure S31.** GCD curves registered for graphene functionalized with **BB7**.

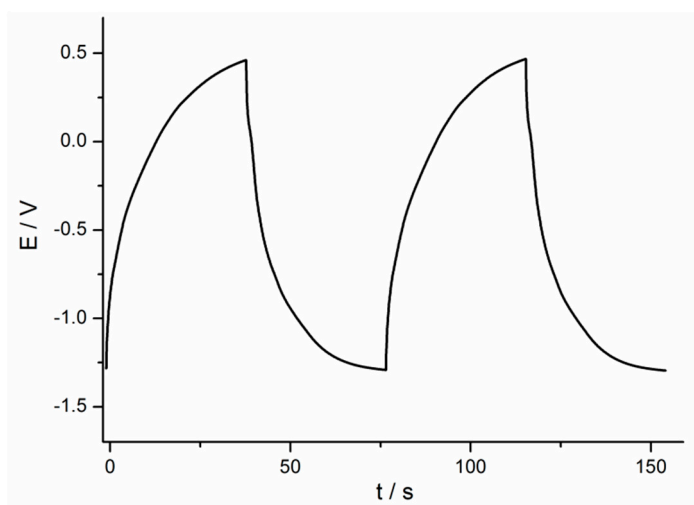

**Figure S32.** GCD curves registered for graphene functionalized with **BF6**.



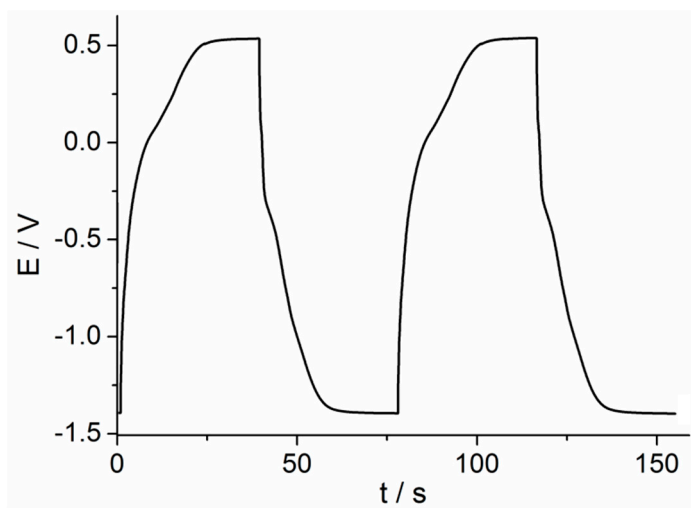

**Figure S33.** GCD curves registered for graphene functionalized with **BF7**.

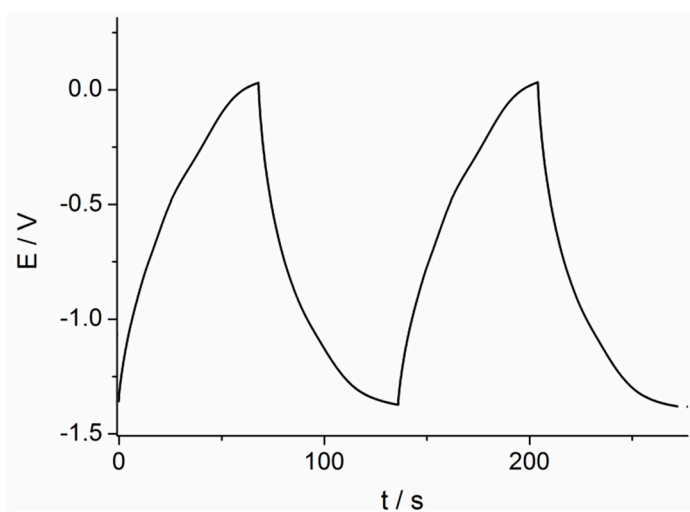

**Figure S34.** GCD curves registered for graphene functionalized with **BP6**.

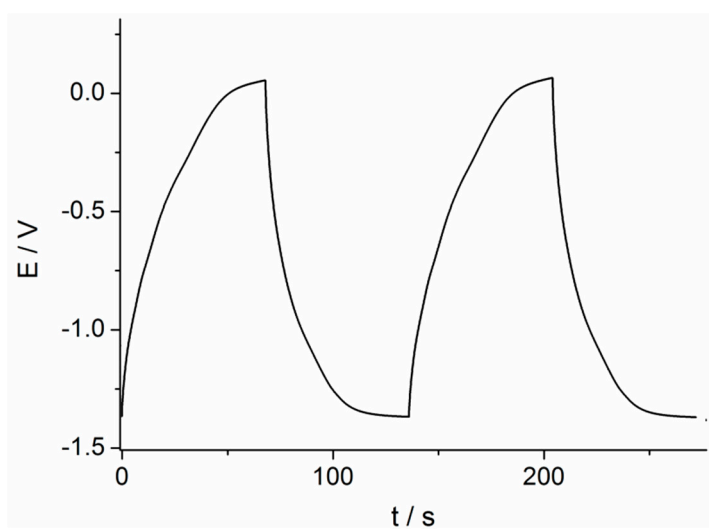

**Figure S35.** GCD curves registered for graphene functionalized with **BP7**.

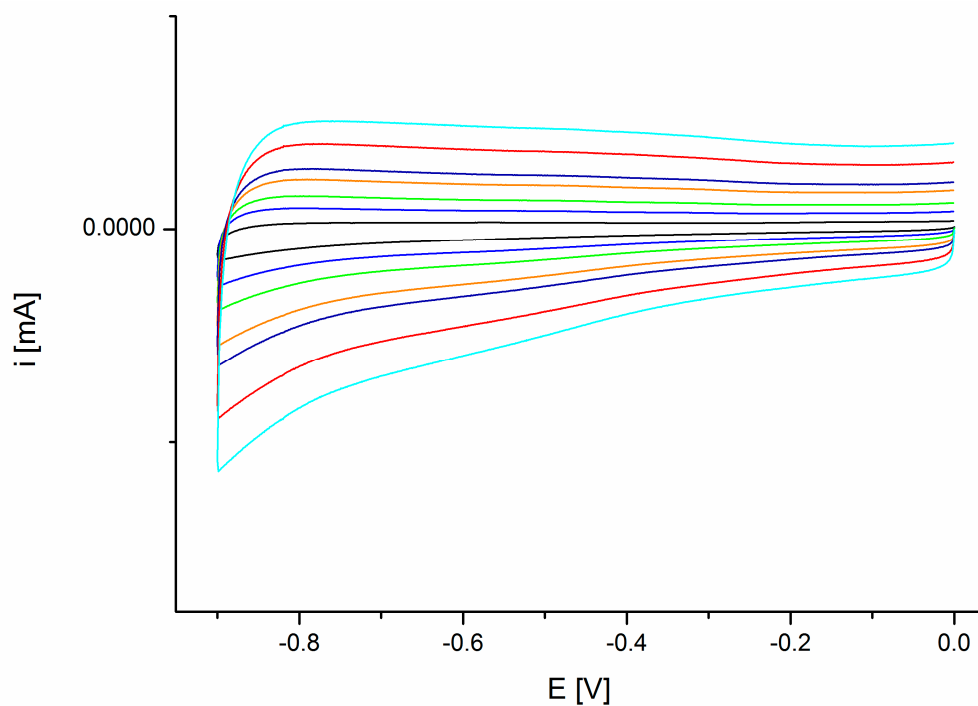

**Figure S36.** CV curves registered for graphene functionalized with **BB6** at different scan rates of: 20, 50, 100, 150, 200, 300 and 400  $\text{mV s}^{-1}$  .

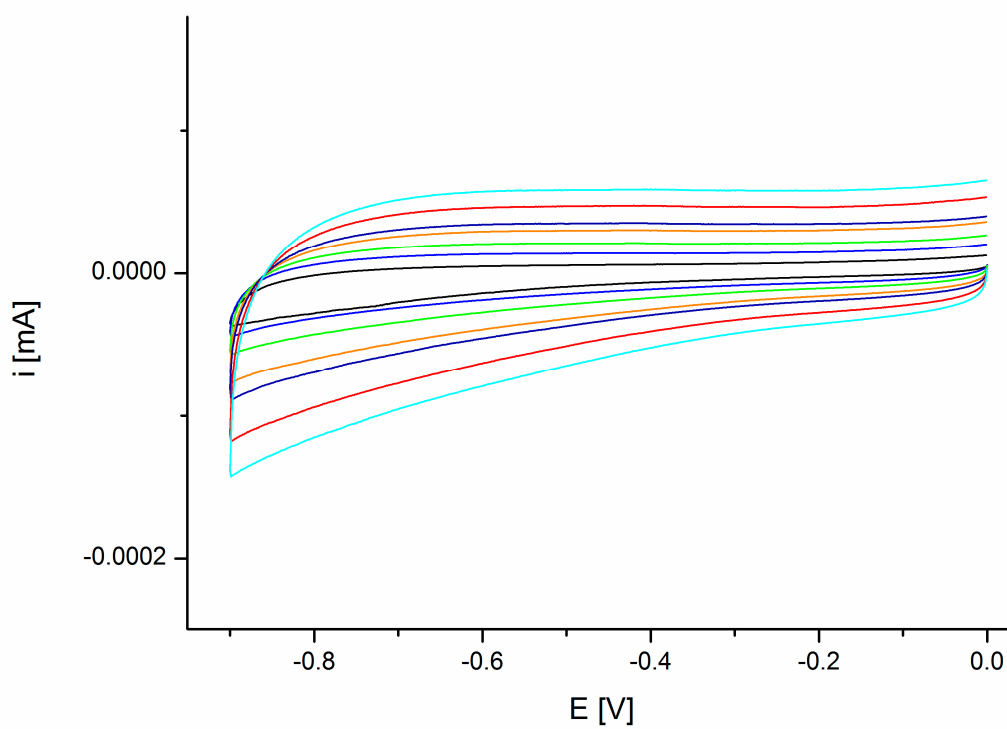

**Figure S37.** CV curves registered for graphene functionalized with **BB7** at different scan rates of: 20, 50, 100, 150, 200, 300 and 400  $\text{mV s}^{-1}$  .

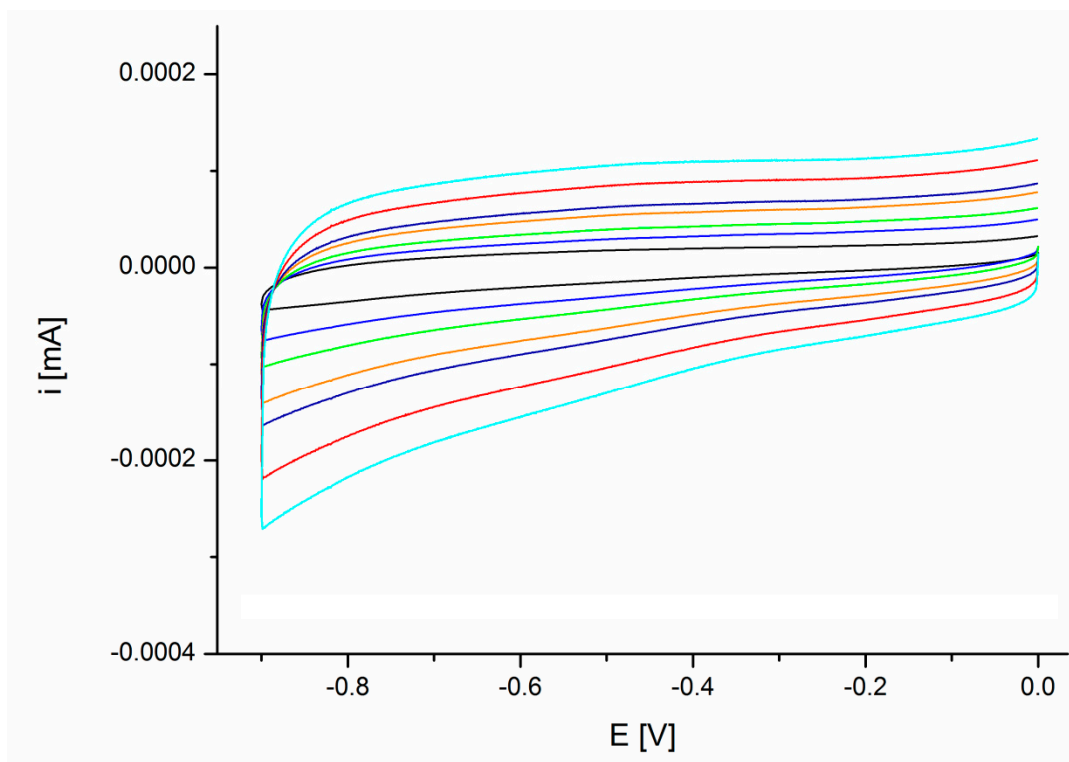

**Figure S38.** CV curves registered for graphene functionalized with **BF6** at different scan rates of: 20, 50, 100, 150, 200, 300 and 400  $\text{mV s}^{-1}$ .

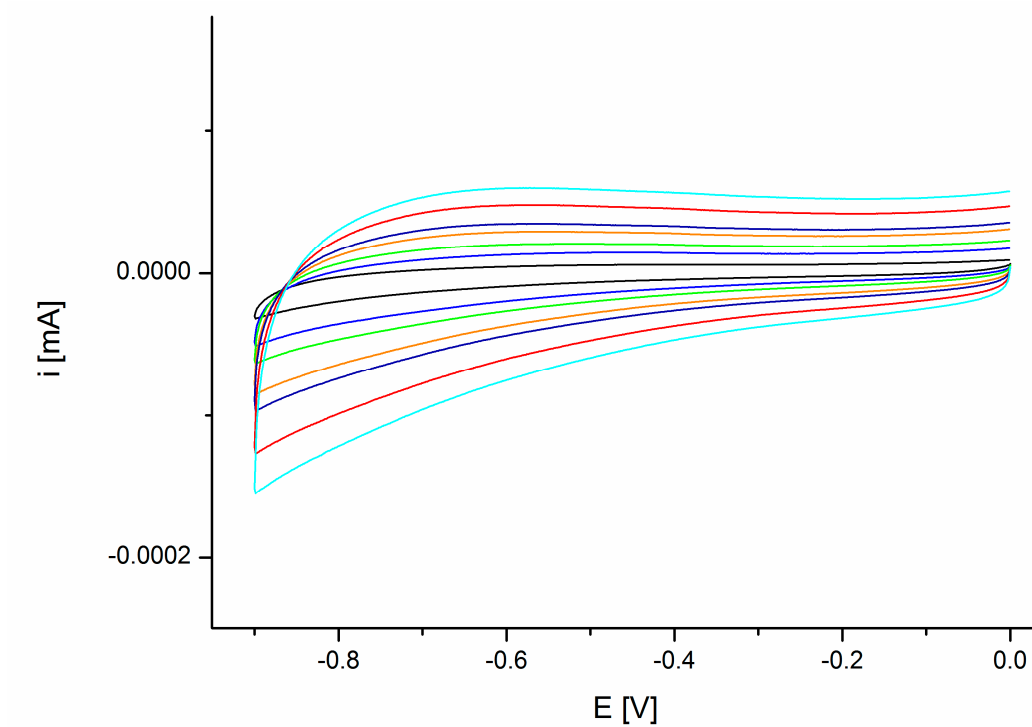

**Figure S39.** CV curves registered for graphene functionalized with **BF7** at different scan rates of: 20, 50, 100, 150, 200, 300 and 400  $\text{mV s}^{-1}$ .

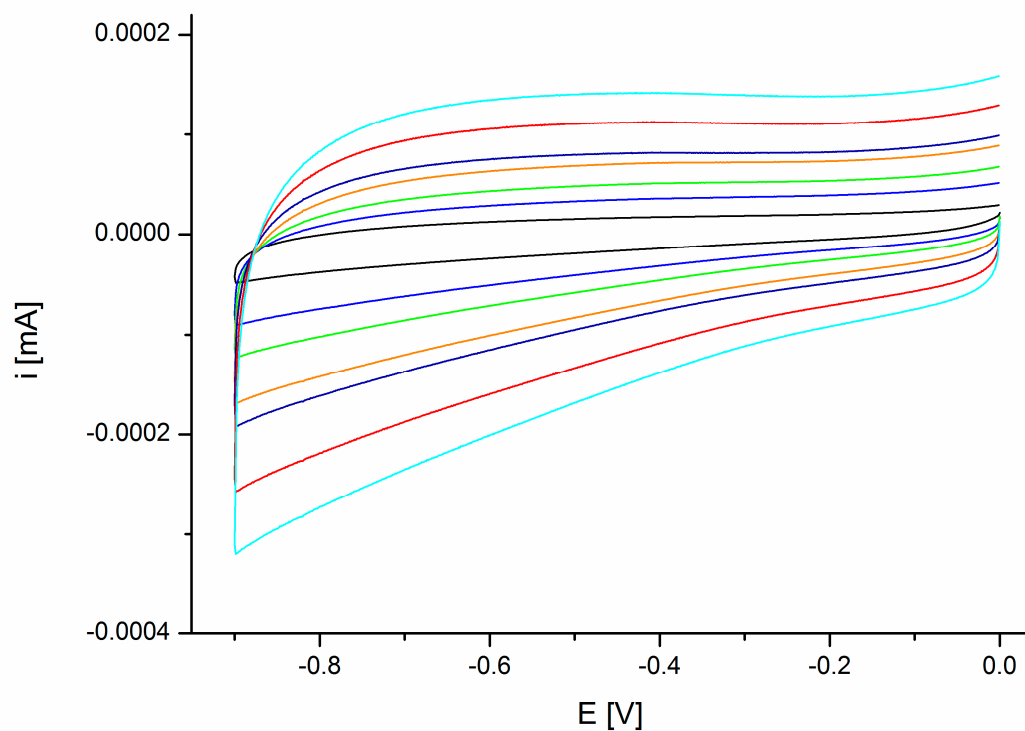

**Figure S40.** CV curves registered for graphene functionalized with **BP6** at different scan rates of: 20, 50, 100, 150, 200, 300 and 400  $\text{mV s}^{-1}$ .

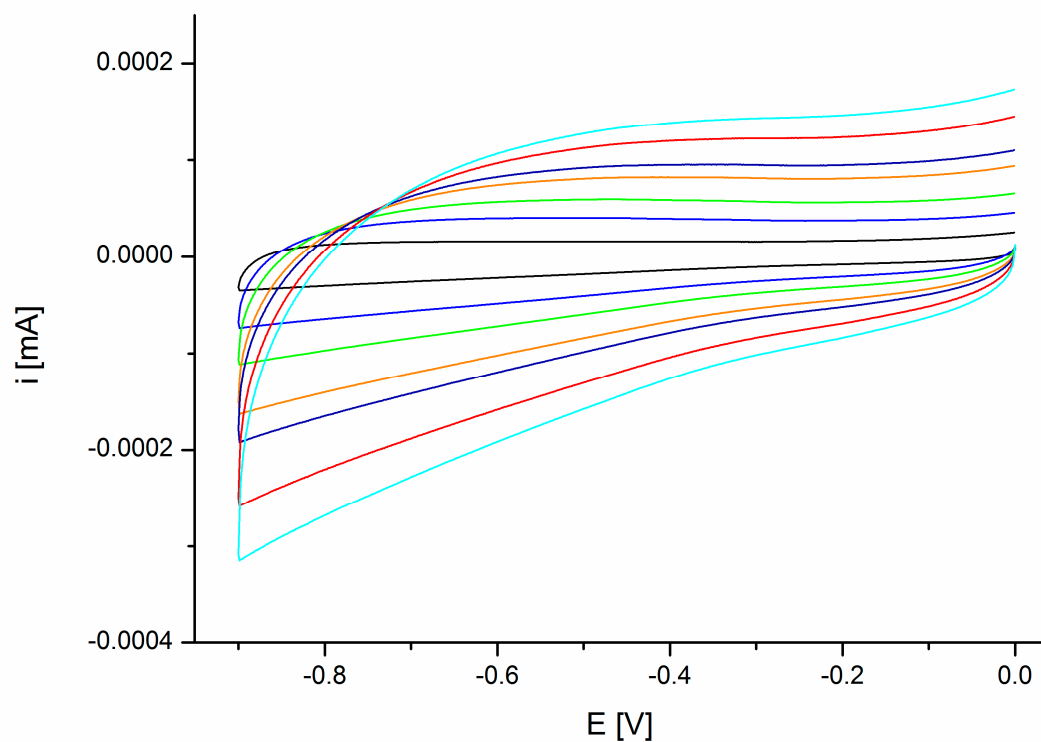

**Figure S41.** CV curves registered for graphene functionalized with **BP7** at different scan rates of: 20, 50, 100, 150, 200, 300 and 400  $\text{mV s}^{-1}$ .
